# Supplementary material for: Impact of polymorphism on mechanical properties of molecular crystals: a study of p-amino and p-nitro benzoic acid with nanoindentation
Source: Royal Society of Chemistry journal article supplement (doi:10.1039/d1ce00041a), 2021-01-01
Supplement: d1ce00041a1.pdf [file d1ce00041a1.pdf]

# Impact of Polymorphism on Mechanical Properties of Molecular Crystals: A study of *p*-Amino and *p*-Nitro Benzoic Acid with Nanoindentation.

Benjamin P. A. Gabriele<sup>a</sup>, Craig J. Williams<sup>b</sup>, Matthias E. Lauer<sup>c</sup>, Brian Derby<sup>b</sup>, Aurora J. Cruz-Cabeza<sup>a\*</sup>

<sup>a</sup> School of Chemical Engineering and Analytical Science, University of Manchester, UK.

<sup>b</sup> School of Materials, University of Manchester, UK.

<sup>c</sup> Roche Innovation Center Basel, Basel, Switzerland

\*Email: [aurora.cruzcabeza@manchester.ac.uk](mailto:aurora.cruzcabeza@manchester.ac.uk)

**Abstract:** This Electronic Supplementary Information (ESI) includes the results of single crystal x-ray diffraction measurements, similarities in crystal packing of polymorphs of *p*NBA, the trapezoid load functions used for the nanoindentation experiments, images of the indents and the periodic bond chains of the two pairs of polymorphs of *p*NBA and *p*ABA.

## S1. Experimental Methods

**Single Crystal X-ray Diffraction.** Single crystals of *p*NBA (forms I and II) and *p*ABA ( $\alpha$  and  $\beta$  forms) were mounted on a spindle using a thick microscope oil and their crystal lattice was determined at room temperature using a single crystal x-ray diffractometer (XCalibur-2, Oxford) equipped with a MoK $\alpha$  X-ray source ( $\lambda = 0.71073\text{\AA}$ ). Using the software CrysAlisPro<sup>1</sup> (version 171.40.14d, Rigaku Oxford Diffraction), from the X-ray measurements the unit cells of each single crystal were determined and verified to match the CSD refcode associated, so that to confirm the polymorphic form.

**Nanoindentation.** Experiments were carried out on 7 to 10 single crystals per molecule studied (9 indents per crystal) using a Hysitron Ti950 Triboindenter (Hysitron/Bruker) equipped with a diamond Berkovich probe. Indentations were conducted in either load-control or displacement-control mode using a trapezoid load function. We first investigated the optimal maximum displacement/load as defined in a previous work, so the modulus and hardness measured do not vary for further increase or decrease of  $P_{MAX}$  or  $h_{MAX}$ .<sup>2</sup> The trapezoid load functions used were hence adapted for each compound studied.

**Imaging.** Indents were imaged either in-situ, with the same probe used to carry out the indents (in-situ scanning probe microscopy in contact mode, 2  $\mu\text{N}$ ) or via Atomic Force Microscopy (AFM, Multimode 8, Bruker) using Peak Force QNM in air and with a TESP-V2 probe ( $k = 42\text{ N/m}$ ).

## S2. Single crystal X-ray data

Comparison between experimental (“Experim.”) results of single crystal x-ray diffraction data and crystallographic data from associated CSD refcode is hereafter shown:

|                            | <i>p</i> NBA-I<br>Experim. / NBZOAC03 <sup>3</sup> | <i>p</i> NBA-II<br>Experim. / NBZOAC14 <sup>4</sup> | $\alpha$ - <i>p</i> ABA<br>Experim. / AMBNAC06 <sup>5</sup> | $\alpha$ - <i>p</i> ABA<br>Experim. / AMBNAC04 <sup>6</sup> |
|----------------------------|----------------------------------------------------|-----------------------------------------------------|-------------------------------------------------------------|-------------------------------------------------------------|
| SG                         | A2 <sub>1</sub> /a                                 | P2 <sub>1</sub> /c                                  | P2 <sub>1</sub> /n                                          | P2 <sub>1</sub> /n                                          |
| <i>a</i> (Å)               | 12.959 / 12.918                                    | 5.482 / 5.473                                       | 18.569 / 18.571                                             | 6.281 / 6.278                                               |
| <i>b</i> (Å)               | 5.039 / 5.042                                      | 5.222 / 5.209                                       | 3.840 / 3.843                                               | 8.592 / 8.583                                               |
| <i>c</i> (Å)               | 21.330 / 21.298                                    | 24.740 / 24.729                                     | 18.670 / 18.632                                             | 12.365 / 12.365                                             |
| $\alpha$ (°)               | 90                                                 | 90                                                  | 90                                                          | 90                                                          |
| $\beta$ (°)                | 96.67 / 96.66                                      | 95.57 / 95.41                                       | 93.66 / 93.67                                               | 100.15 / 100.13                                             |
| $\gamma$ (°)               | 90                                                 | 90                                                  | 90                                                          | 90                                                          |
| <i>Z</i> ; <i>Z'</i>       | 8; 1                                               | 4; 1                                                | 8; 2                                                        | 4; 1                                                        |
| <i>V</i> (Å <sup>3</sup> ) | 1384.0 / 1377.8                                    | 705.0 / 701.0                                       | 1328.4 / 1327.1                                             | 656.9 / 655.9                                               |

## S3. Crystal packing similarities

The Crystal Packing Similarity module (derived from the module COMPACK), integrated in the software Mercury, was used to compare and assess similarities between crystal packing of *p*NBA-I and *p*NBA-II. Layers in common stack in both cases along [101], as shown in Figure S3. No common packing/layers were observed between  $\alpha$ -*p*ABA and  $\beta$ -*p*ABA.

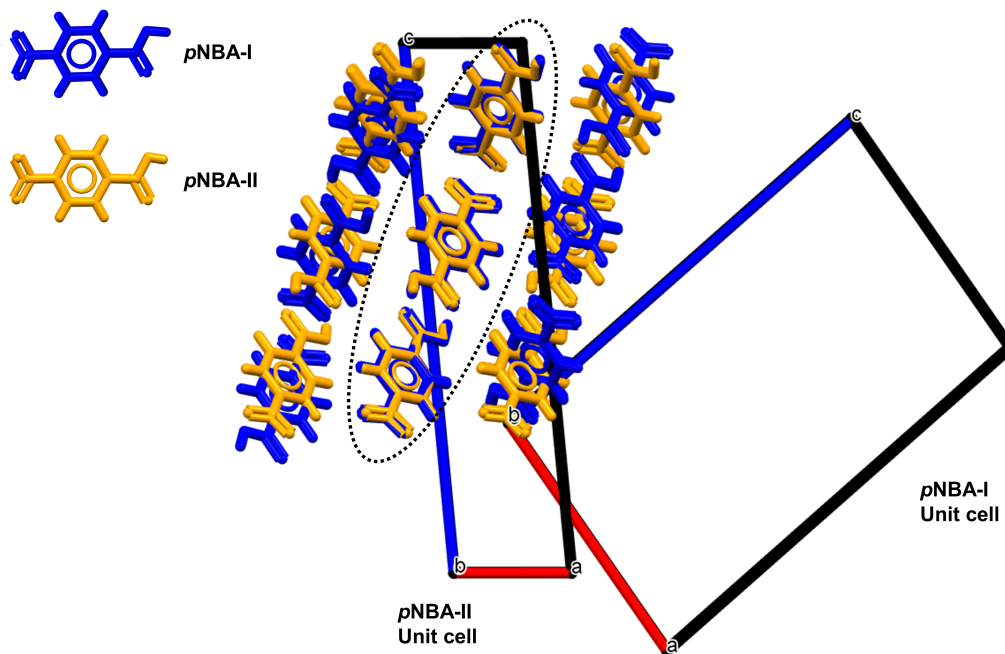

**Figure S3:** Comparison of crystal packing of *p*NBA-I (molecules in blue) and *p*NBA-II (molecules in yellow).

#### S4. Nanoindentation – Load function

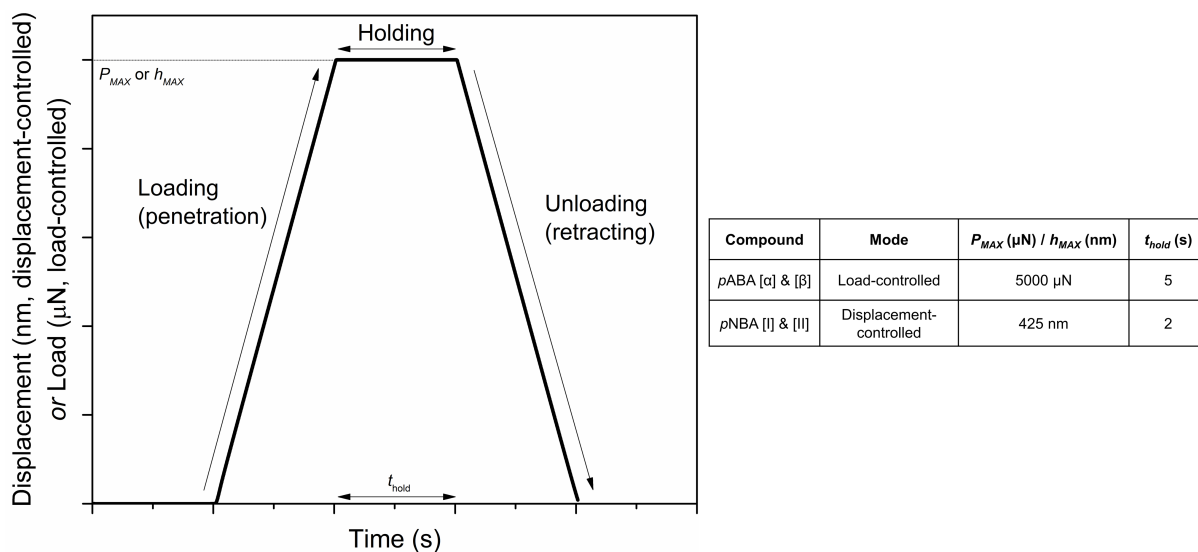

**Figure S4:** The trapezoid load function used on *p*ABA and *p*NBA is presented here along with the different parameters, namely the mode used (load-controlled or displacement-controlled), the maximum load  $P_{MAX}$  or maximum displacement  $h_{MAX}$  used and the holding time used.

#### S5. Nanoindentation – Images

Images of indents on  $\alpha$ -*p*ABA and  $\beta$ -*p*ABA were acquired via AFM while images on indents on both forms of *p*NBA were acquired in-situ, using the Berkovich tip used for the indentation as probe, in contact mode and with a force of 2  $\mu\text{N}$ . Images are shown in Figure S5.

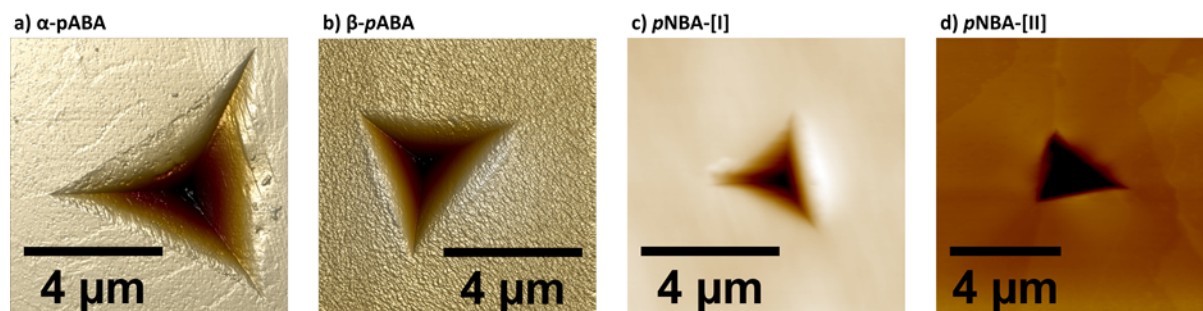

**Figure S5:** AFM height images of  $\alpha$ -*p*ABA (a) and  $\beta$ -*p*ABA (b) *p*ABA, and *in-situ* SPM images in contact mode (2  $\mu\text{N}$ ) of (c) *p*NBA-[I] and (d) *p*NBA-[II].

## S6. Lattice Energies, Cohesive Energy Densities

**Table S6:**  $E_R$  and  $H$  data (average  $\pm$  stdv) measured by nanoindentation on *p*NBA forms I and II and *p*ABA forms  $\alpha$  and  $\beta$ . Space Group (SG) and *hkl* indices of the indented face are also given, along with the calculated lattice energies with CompassII ( $U_{Latt}$ ) and cohesive energy density (CED).

| Compound                  | SG       | Indented Face | Nanoindentation $E_R \pm$ stdv (GPa) | Nanoindentation $H \pm$ stdv (MPa) | $U_{LATT}$ (kJ/mol) | CED (MPa) |
|---------------------------|----------|---------------|--------------------------------------|------------------------------------|---------------------|-----------|
| <i>p</i> ABA [ $\alpha$ ] | $P2_1/n$ | (200)         | $7.88 \pm 0.28$                      | $221 \pm 17$                       | -104.3              | 1045      |
| <i>p</i> ABA [ $\beta$ ]  | $P2_1/n$ | (10-1)        | $12.50 \pm 0.35$                     | $512 \pm 25$                       | -119.5              | 1210      |
| <i>p</i> NBA [I]          | $A2/a$   | (002)         | $10.1 \pm 0.53$                      | $322 \pm 22$                       | -111.6              | 1077      |
| <i>p</i> NBA [II]         | $P2_1/c$ | (002)         | $6.46 \pm 0.28$                      | $182 \pm 10$                       | -106.3              | 1006      |

## References

- (1) CrysAlis PRO, Version 171.40.14d, Oxford Diffraction /Agilent Technologies UK Ltd, Yarnton, England. 2018.
- (2) Gabriele, B. P. A.; Williams, C. J.; Lauer, M. E.; Derby, B.; Cruz-Cabeza, A. J. Nanoindentation of Molecular Crystals: Lessons Learned from Aspirin. *Cryst. Growth Des.* **2020**, *20*, 5956–5966.
- (3) Colapietro, M.; Domenicano, A. Structural Studies of Benzene Derivatives. II. Refinement of the Crystal Structure of *p*-Nitrobenzoic Acid. *Acta Crystallogr. Sect. B Struct. Crystallogr. Cryst. Chem.* **1977**, *33*, 2240–2243.
- (4) Light, M. E. CCDC 1476879. *CSD Commun.* **2016**.
- (5) Athimoolam, S.; Natarajan, S. 4-Carboxy-Anilinium (2R,3R)-Tartrate and a Redetermination of the  $\alpha$ -Polymorph of 4-Amino-Benzoic Acid. *Acta Crystallogr. Sect. C Cryst. Struct. Commun.* **2007**, *63*, 514–517.
- (6) Gracin, S.; Fischer, A. Redetermination of the  $\beta$ -Polymorph of *p*-Aminobenzoic Acid. *Acta Crystallogr. Sect. E Struct. Reports Online* **2005**, *61*.
